# Supplementary material for: Therapeutic Effects of Traditional Chinese Medicine on Spinal Cord Injury: A Promising Supplementary Treatment in Future
Source: Hindawi journal article supplement (doi:10.1155/2016/8958721), 2016-01-01

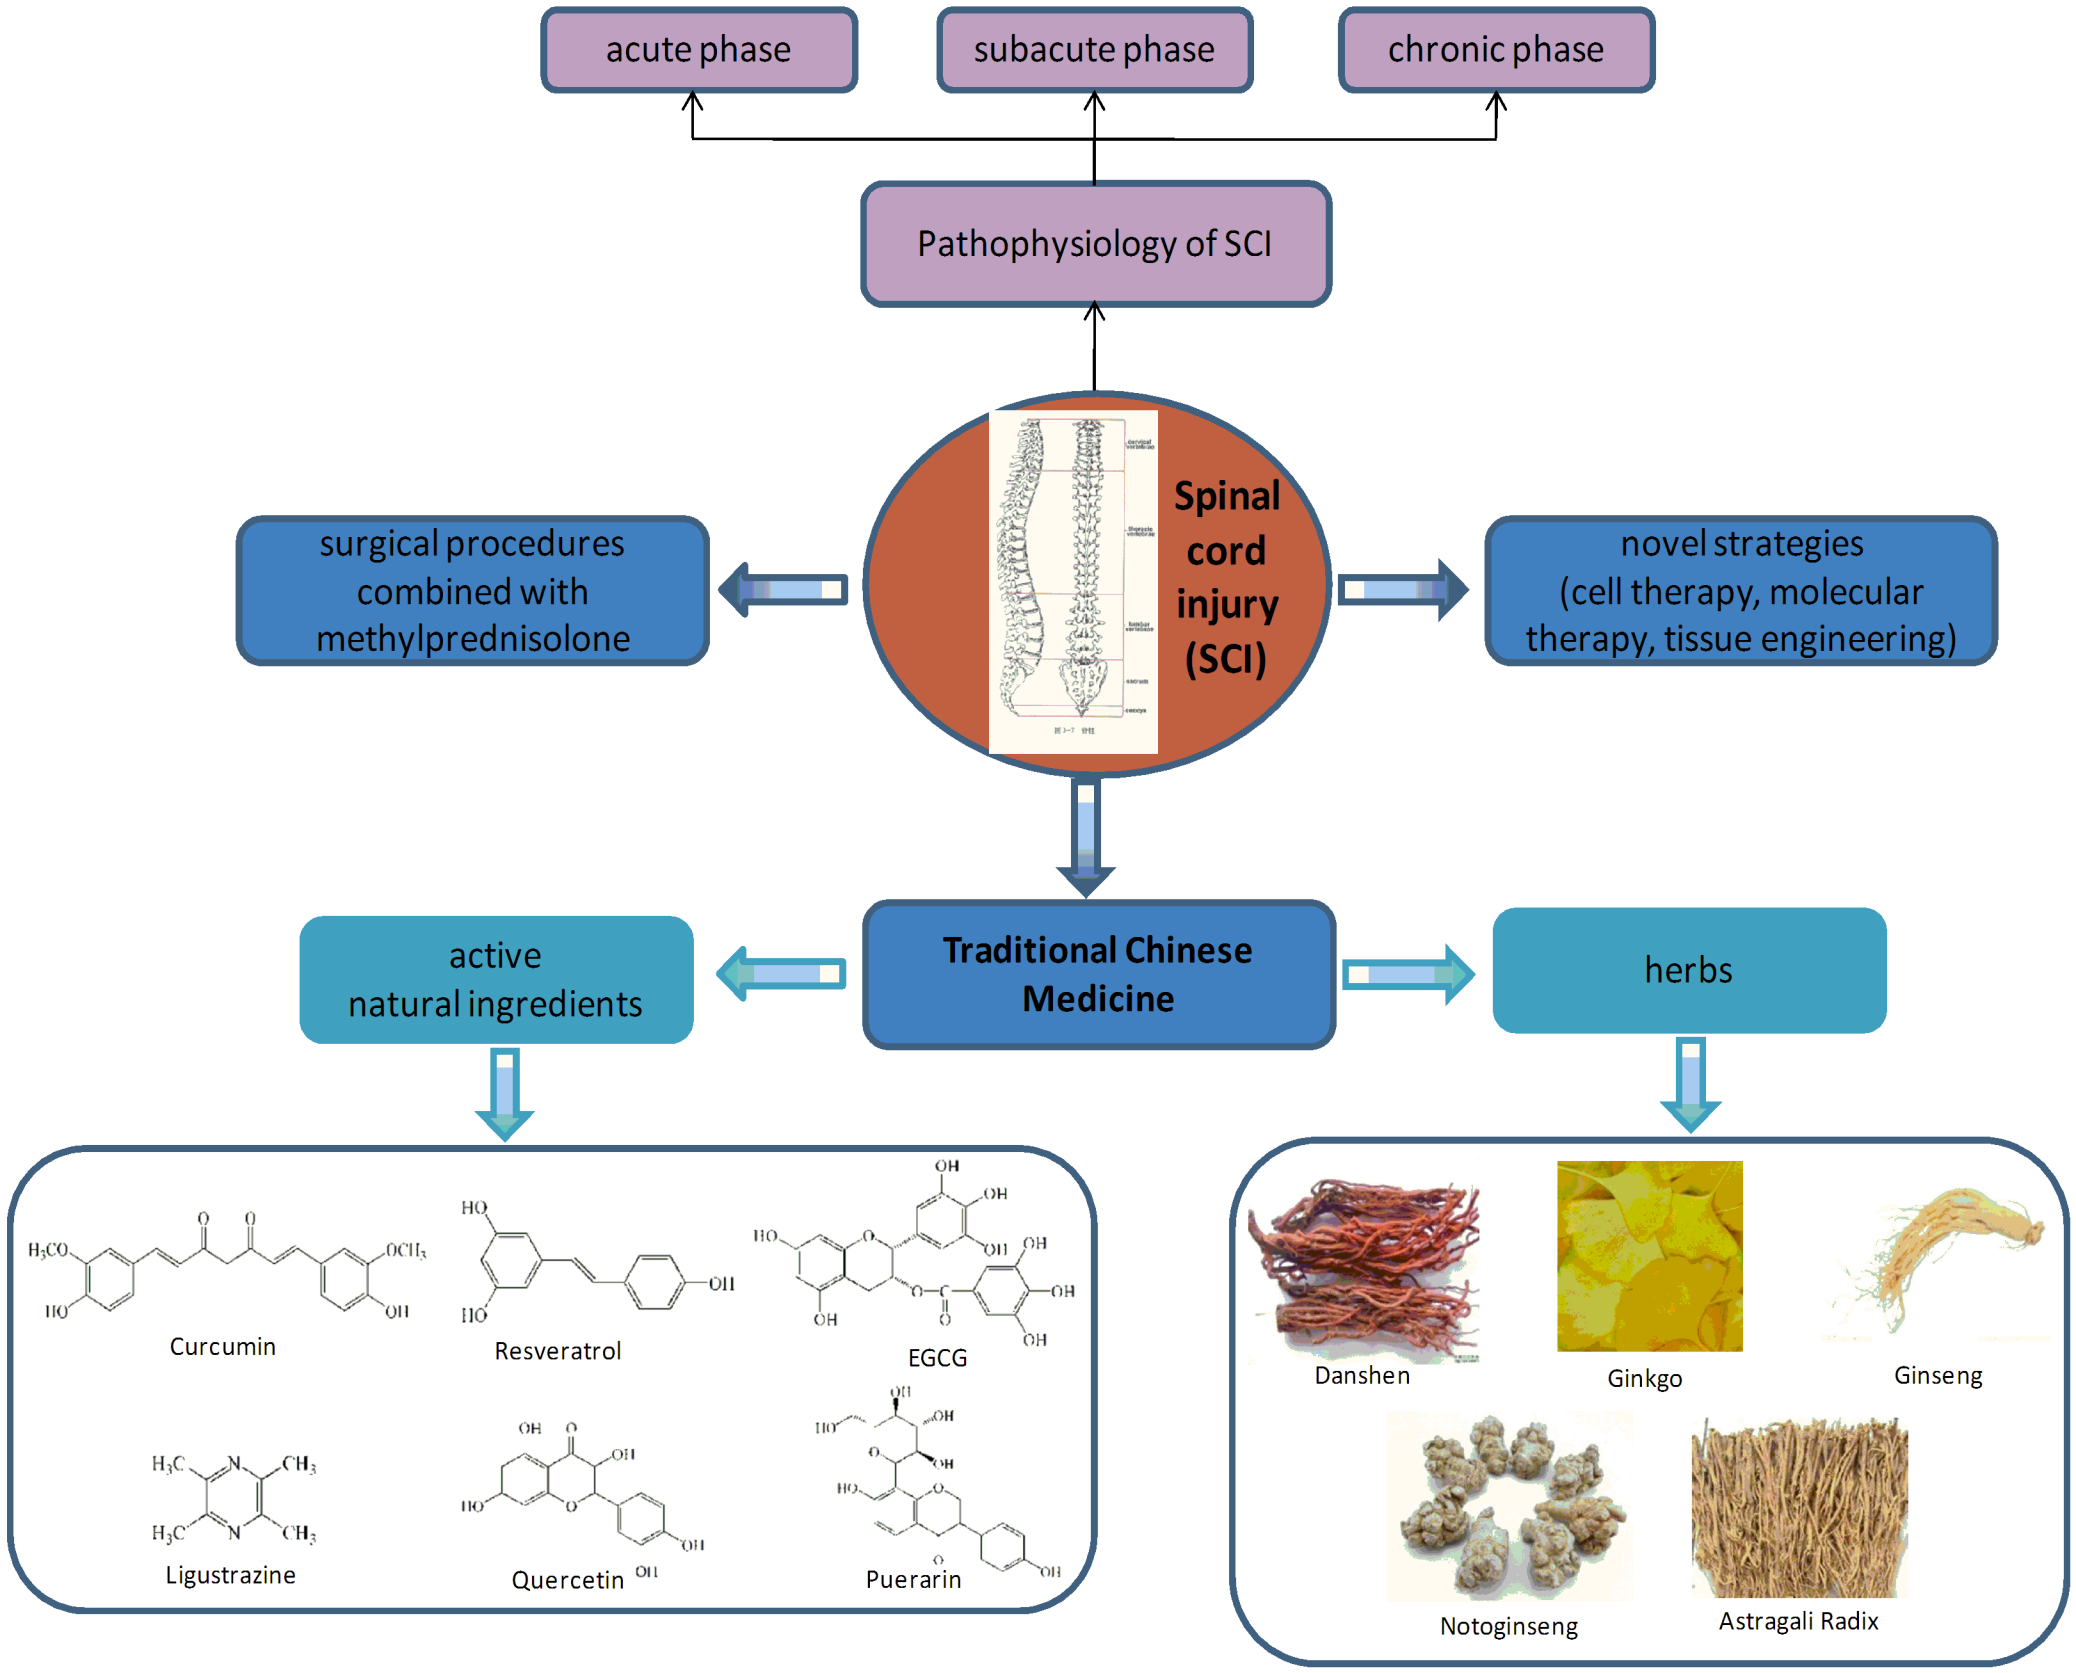

Supplement: f1 [file 8958721.f1.pdf]
